# Supplementary material
Source: Springer Nature journal article supplement (https://www.springermedizin.de/resource/supplementary/13002_2010_214_MOESM1_ESM.pdf/9627482)

# MAP OF ARUNACHAL PRADESH

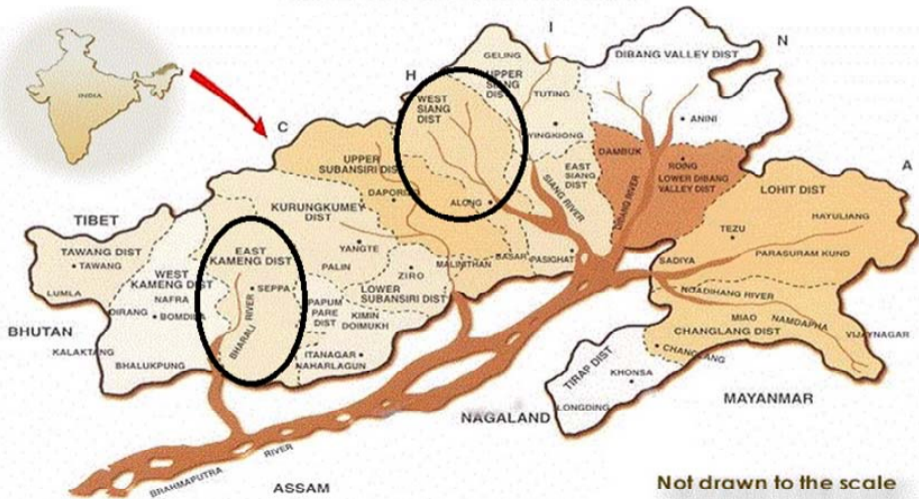

Not drawn to the scale

Supplement: MOESM1 [file 9627482]
